# Supplementary material
Source: publisher figshare collection journal article supplement (https://karger.figshare.com/articles/dataset/_/7951157)
Supplement: Supplementary file 1 [file 1]

| Supplemental Table 2. Demographic and clinical characteristics of all included subjects per study group for the inclusion period of 28 days | | | | |
| --- | --- | --- | --- | --- |
|  | **LOS**  (n= 194) | **Non LOS**  (n=561) | **Unadjusted OR**  (95% CI) | **p-value** |
| Gestational age (median [IQR], weeks + days) | 27+1 [25+5-28+5] | 28+1 [26+6-29+1] | 0.964 [0.951-0.978] | *<0.001* |
| Birth weight (mean [SD], g) | 967 [280] | 1068 [269] | 0.999 [0.998-0.999] | *<0.001* |
| Gender *Male* (n[%]) | 106 [54.6] | 292 [52.0] | 1.110 [0.800-1.540] | 0.534 |
| Delivery mode *Vaginal delivery* (n[%]) | 90 [46.4] | 253 [45.1] | 0.922 [0.663-1.281] | 0.628 |
| Multiple births (n[%]) | 73 [37.6] | 178 [31.7] | 1.306 [0.928-1.836] | 0.125 |
| PPROM (n[%]) | 46 [23.7] | 121 [21.6] | 1.162 [0.788-1.713] | 0.449 |
| Meconium amniotic fluid (n[%]) | 4 [2.1] | 13 [2.3] | 0.889 [0.286-2.761] | 0.839 |
| 1-min Apgar (median[IQR]) | 5 [3-7] | 6 [4-7] | 0.926 [0.863-0.994] | *0.033* |
| 5-min Apgar (median[IQR]) | 7 [6-8] | 8 [7-9] | 0.907 [0.825-0.998] | *0.046* |
| PDA (n[%]) | 89 [45.9] | 151 [26.9] | 2.301 [1.641-3.228] | *<0.001* |
| Central line exposure (n[%])  Central line days (median[IQR]) | 157 [80.9]  9 [5-13] | 446 [79.5]  8 [4-11] | 1.056 [0.698-1.598]  1.031 [1.006-1.058] | 0.796  *0.016* |
| Peripheral line exposure (n[%])  Peripheral line days (median[IQR]) | 194 [100]  17 [12-23] | 549 [97.9]  10 [7-16] | NA  1.100 [1.076-1.126] | 0.999  *<0.001* |
| RBC transfusion exposure (n[%])  RBC transfusion days (median [IQR]) | 146 [75.3]  2 [1-4] | 301 [53.7]  1 [0-2] | 2.567 [1.779-3.702]  1.323 [1.219-1.435] | *<0.001*  *<0.001* |
| Enteral feeding type (n[%])  *Breast Milk*  *Formula Milk*  *Combination*  Age at full enteral feeding in days (median[IQR]) | 124 [63.9]  30 [15.5]  31 [16.0]  13 [11-17] | 371 [66.1]  78 [13.9]  68 [12.1]  3 [2-4] | *Reference*  0.151 [0.721-1.837]  1.364 [0.852-2.184]  3.874 [2.659-5.644] | 0.408  0.556  0.196  *<0.001* |
| Total days parental feeding (median [IQR]) | 13 [10-16] | 10 [8-12] | 1.169 [1.116-1.224] | *<0.001* |
| Postpartum antibiotics (n[%])  *Not administered*  *1-3 days administered*  *> 3days administered* | 27 [13.9]  111 [57.2  56 [28.9] | 76 [13.5]  351 [62.6]  134 [23.9] | *Reference*  0.890 [0.546-1.450]  1.176 [0.686-2.016] | 0.349  0.640  0.555 |
| Antibiotic exposure (yes/no) (n[%])  Antibiotics days (median (IQR])  Antibiotic exposure per group *(n[%])*  *Aminoglycoside*  *Carbapenem*  *Cephalosporin*  *Glycopeptide*  *Macrolides*  *Oxazolidinones*  *Penicillin (-clavulanic acid)*  *Quinolones*  *Rifampicin*  *Trimethoprim-sulfamethoxazole* | 193 [100]  14 [10-18]  171 [88.1]  52 [26.8]  122 [62.9]  127 [65.5]  6 [3.1]  3 [1.5]  187 [96.4]  1 [0.5]  1 [0.5]  1 [0.5] | 529 [94.3]  5 [3-9]  453 [80.7]  27 [4.8]  169 [30.1]  120 [21.4]  17 [3.0]  0  518 [92.3]  1 [0.2]  2 [0.4]  2 [0.4] | NA  1.240 [1.198-1.283]  1.247 [0.758-2.053]  6.795 [4.118-11.213]  3.599 [2.552-5.077]  6.445 [4.500-9.230]  0.959 [0.373-2.470]  NA  1.956 [0.859-4.456]  2.731 [0.170-43.869]  1.363 [0.123-15.113]  1.363 [0.123-15.113] | 0.998  *<0.001*  0.385  *<0.001*  *<0.001*  *<0.001*  0.931  0.999  0.110  0.478  0.801  0.801 |
| Mortality (n[%])  *Age of death* (median [IQR]) | 13 [6.7]  17 [10-21] | 12 [2.1]  14 [8-17] | 3.286 [1.473-7.330]  1.110 [0.966-1.275] | *0.004*  0.140 |
| Discharge before 28 days (n[%])  *Age at discharge* (median [IQR]) | 51 [26.3]  18 [13-21] | 239 [42.6]  18 [12-23] | 0.498 [0.343-0.722]  1.009 [0.962-1.059] | *<0.001*  0.703 |

**Abbreviations:** IQR= interquartile ranger; PPROM = preterm premature rupture of membranes; PDA = patent ductus arteriosus; RBC= red blood cells.
